# Supplementary material for: Specific Proteins in Nontuberculous Mycobacteria: New Potential Tools
Source: Hindawi journal article supplement (doi:10.1155/2015/964178), 2015-01-01
Supplement: f1 [file 964178.f1.pdf]

BLAST ®

Basic Local Alignment Search Tool

NCBI/ [BLAST](#)/ [blastp suite](#)/ **Formatting Results - 96S3KF5E015**  
[Formatting options](#)  
[Download](#)  
[Blast report description](#)

ref|YP\_887965| (208 letters)

**RID** [96S3KF5E015](#) (Expires on 12-20 06:17 am)

**Query ID** [gi|118468679|ref|YP\\_887965.1|](#)  
**Description** mannose-binding lectin [Mycobacterium smegmatis str. MC2 155]

**Molecule type** amino acid  
**Query Length** 208

**Database Name** nr  
**Description** All non-redundant GenBank CDS translations+PDB+SwissProt+PIR+PRF excluding environmental samples from WGS projects  
**Program** BLASTP 2.2.30+

New

DELTA-BLAST, a more sensitive

Graphic Summary

Descriptions

Sequences producing significant alignments:

| Description                                                              | Max score | Total score | Query cover | E value | Ident | Accession                      |
|--------------------------------------------------------------------------|-----------|-------------|-------------|---------|-------|--------------------------------|
| hypothetical protein K875_04270 [Mycobacterium tuberculosis TTK-01-0051] | 255       | 255         | 100%        | 1e-84   | 72%   | <a href="#">KBZ61319.1</a>     |
| peptidoglycan-binding protein [Mycobacterium tuberculosis]               | 62.4      | 62.4        | 22%         | 3e-12   | 62%   | <a href="#">WP_029404272.1</a> |
| hypothetical protein [Mycobacterium tuberculosis]                        | 60.5      | 119         | 23%         | 3e-11   | 61%   | <a href="#">WP_029401579.1</a> |
| hypothetical protein [Mycobacterium tuberculosis]                        | 58.9      | 92.4        | 23%         | 7e-11   | 56%   | <a href="#">WP_031742300.1</a> |
| hypothetical protein [Mycobacterium tuberculosis]                        | 58.5      | 58.5        | 23%         | 7e-11   | 56%   | <a href="#">WP_031678612.1</a> |
| hypothetical protein [Mycobacterium tuberculosis]                        | 61.2      | 175         | 23%         | 9e-11   | 62%   | <a href="#">WP_029398816.1</a> |
| mycolyltransferase II [Mycobacterium tuberculosis KT-0057]               | 63.2      | 349         | 23%         | 9e-11   | 64%   | <a href="#">KCG34533.1</a>     |
| hypothetical protein [Mycobacterium tuberculosis]                        | 58.5      | 95.5        | 23%         | 1e-10   | 56%   | <a href="#">WP_029401003.1</a> |
| hypothetical protein [Mycobacterium tuberculosis]                        | 58.2      | 58.2        | 23%         | 2e-10   | 56%   | <a href="#">WP_031699806.1</a> |
| hypothetical protein [Mycobacterium tuberculosis]                        | 58.2      | 105         | 23%         | 2e-10   | 56%   | <a href="#">WP_031748240.1</a> |

|                                                                |      |      |     |       |     |                                |
|----------------------------------------------------------------|------|------|-----|-------|-----|--------------------------------|
| hypothetical protein [Mycobacterium tuberculosis]              | 58.5 | 58.5 | 22% | 2e-10 | 62% | <a href="#">WP_031679078.1</a> |
| hypothetical protein [Mycobacterium tuberculosis]              | 58.2 | 114  | 23% | 3e-10 | 56% | <a href="#">WP_031677397.1</a> |
| hypothetical protein [Mycobacterium tuberculosis]              | 58.2 | 156  | 23% | 4e-10 | 56% | <a href="#">WP_031716657.1</a> |
| hypothetical protein [Mycobacterium canettii]                  | 60.8 | 168  | 26% | 4e-10 | 59% | <a href="#">WP_015289732.1</a> |
| hypothetical protein [Mycobacterium tuberculosis]              | 58.2 | 162  | 23% | 5e-10 | 56% | <a href="#">WP_031737836.1</a> |
| hypothetical protein [Mycobacterium canettii]                  | 60.8 | 171  | 23% | 5e-10 | 59% | <a href="#">WP_015302928.1</a> |
| hypothetical protein [Mycobacterium canettii]                  | 60.8 | 173  | 23% | 5e-10 | 59% | <a href="#">WP_015292837.1</a> |
| mycolyltransferase II [Mycobacterium tuberculosis BTB12-211]   | 60.8 | 229  | 23% | 5e-10 | 62% | <a href="#">KCR30552.1</a>     |
| mycolyltransferase II [Mycobacterium tuberculosis KT-0025]     | 60.8 | 229  | 23% | 5e-10 | 62% | <a href="#">KBM47586.1</a>     |
| hypothetical protein [Mycobacterium tuberculosis]              | 60.5 | 173  | 23% | 5e-10 | 62% | <a href="#">WP_023642574.1</a> |
| mycolyltransferase II [Mycobacterium tuberculosis TKK_02_0058] | 60.8 | 285  | 23% | 5e-10 | 62% | <a href="#">KBX09438.1</a>     |
| hypothetical protein [Mycobacterium tuberculosis]              | 60.5 | 168  | 23% | 6e-10 | 62% | <a href="#">WP_031738033.1</a> |
| hypothetical protein [Mycobacterium tuberculosis]              | 60.5 | 168  | 23% | 6e-10 | 62% | <a href="#">WP_031683131.1</a> |
| hypothetical protein [Mycobacterium tuberculosis]              | 60.5 | 168  | 23% | 6e-10 | 62% | <a href="#">WP_031654254.1</a> |
| hypothetical protein [Mycobacterium tuberculosis]              | 60.5 | 168  | 23% | 6e-10 | 62% | <a href="#">WP_031728693.1</a> |
| hypothetical protein [Mycobacterium tuberculosis]              | 60.5 | 281  | 23% | 6e-10 | 62% | <a href="#">WP_024918601.1</a> |
| hypothetical protein [Mycobacterium tuberculosis]              | 60.5 | 172  | 23% | 6e-10 | 62% | <a href="#">WP_031725665.1</a> |
| hypothetical protein [Mycobacterium tuberculosis]              | 60.5 | 172  | 22% | 6e-10 | 62% | <a href="#">WP_031701099.1</a> |
| hypothetical protein [Mycobacterium tuberculosis]              | 60.5 | 172  | 22% | 6e-10 | 62% | <a href="#">WP_031647528.1</a> |
| hypothetical protein [Mycobacterium tuberculosis]              | 60.5 | 172  | 22% | 6e-10 | 62% | <a href="#">WP_029402188.1</a> |
| hypothetical protein [Mycobacterium tuberculosis]              | 57.4 | 170  | 23% | 1e-09 | 63% | <a href="#">WP_031695766.1</a> |
| hypothetical protein [Mycobacterium tuberculosis]              | 57.0 | 110  | 36% | 2e-09 | 46% | <a href="#">WP_031743204.1</a> |
| mycolyltransferase II [Mycobacterium tuberculosis XTB13-234]   | 58.9 | 222  | 23% | 2e-09 | 60% | <a href="#">KBS02001.1</a>     |
| hypothetical protein [Mycobacterium tuberculosis]              | 58.5 | 170  | 22% | 2e-09 | 60% | <a href="#">WP_031722178.1</a> |
| hypothetical protein [Mycobacterium canettii]                  | 58.5 | 169  | 23% | 3e-09 | 58% | <a href="#">WP_014000699.1</a> |
| hypothetical protein [Mycobacterium tuberculosis]              | 58.2 | 167  | 25% | 3e-09 | 58% | <a href="#">WP_029404273.1</a> |
| hypothetical protein [Mycobacterium tuberculosis]              | 56.6 | 112  | 23% | 4e-09 | 63% | <a href="#">WP_031739705.1</a> |
| hypothetical protein [Mycobacterium tuberculosis]              | 56.2 | 112  | 23% | 8e-09 | 63% | <a href="#">WP_031688871.1</a> |
| mycolyltransferase II [Mycobacterium tuberculosis H3367]       | 57.0 | 283  | 23% | 9e-09 | 60% | <a href="#">KBF26265.1</a>     |

|                                                                                    |      |     |     |       |     |                                |
|------------------------------------------------------------------------------------|------|-----|-----|-------|-----|--------------------------------|
| hypothetical protein<br>GuangZ0019_1718 [Mycobacterium<br>tuberculosis GuangZ0019] | 57.0 | 279 | 23% | 1e-08 | 63% | <a href="#">EQM21360.1</a>     |
| mycolyltransferase II [Mycobacterium<br>tuberculosis TB_RSA38]                     | 56.6 | 224 | 23% | 1e-08 | 63% | <a href="#">KBO92989.1</a>     |
| hypothetical protein [Mycobacterium<br>tuberculosis]                               | 56.6 | 153 | 23% | 1e-08 | 63% | <a href="#">WP_031661255.1</a> |
| hypothetical protein [Mycobacterium<br>tuberculosis]                               | 56.6 | 113 | 23% | 1e-08 | 63% | <a href="#">WP_024754067.1</a> |
| hypothetical protein [Mycobacterium<br>tuberculosis]                               | 56.6 | 113 | 23% | 1e-08 | 63% | <a href="#">WP_031664783.1</a> |
| mycolyltransferase II [Mycobacterium<br>tuberculosis KT-0047]                      | 56.2 | 167 | 23% | 1e-08 | 63% | <a href="#">KCG16868.1</a>     |
| hypothetical protein [Mycobacterium<br>tuberculosis]                               | 56.6 | 168 | 23% | 1e-08 | 63% | <a href="#">WP_031729870.1</a> |
| hypothetical protein [Mycobacterium<br>tuberculosis]                               | 56.6 | 164 | 23% | 1e-08 | 63% | <a href="#">WP_031682455.1</a> |
| hypothetical protein [Mycobacterium<br>tuberculosis]                               | 56.6 | 168 | 23% | 1e-08 | 63% | <a href="#">WP_031734897.1</a> |
| hypothetical protein [Mycobacterium<br>tuberculosis]                               | 56.6 | 168 | 23% | 1e-08 | 63% | <a href="#">WP_031716944.1</a> |
| hypothetical protein [Mycobacterium<br>tuberculosis]                               | 56.6 | 168 | 23% | 1e-08 | 60% | <a href="#">WP_031751377.1</a> |
| hypothetical protein HKBT2_1374<br>[Mycobacterium tuberculosis BT2]                | 56.6 | 168 | 23% | 1e-08 | 63% | <a href="#">AHJ46171.1</a>     |
| MULTISPECIES: hypothetical protein<br>[Mycobacterium tuberculosis<br>complex]      | 56.6 | 168 | 23% | 1e-08 | 63% | <a href="#">WP_003406625.1</a> |
| hypothetical protein [Mycobacterium<br>tuberculosis]                               | 56.6 | 168 | 23% | 1e-08 | 63% | <a href="#">WP_031729357.1</a> |
| hypothetical protein [Mycobacterium<br>tuberculosis]                               | 56.6 | 168 | 23% | 1e-08 | 63% | <a href="#">WP_031647765.1</a> |
| MULTISPECIES: hypothetical protein<br>[Mycobacterium tuberculosis<br>complex]      | 56.6 | 113 | 23% | 1e-08 | 63% | <a href="#">WP_010950518.1</a> |
| hypothetical protein [Mycobacterium<br>tuberculosis]                               | 56.6 | 155 | 23% | 1e-08 | 63% | <a href="#">WP_031694028.1</a> |
| hypothetical protein [Mycobacterium<br>tuberculosis]                               | 56.6 | 166 | 23% | 1e-08 | 63% | <a href="#">WP_003906571.1</a> |
| hypothetical protein [Mycobacterium<br>tuberculosis]                               | 56.6 | 168 | 23% | 1e-08 | 63% | <a href="#">WP_003904589.1</a> |
| hypothetical protein [Mycobacterium<br>tuberculosis]                               | 56.6 | 168 | 23% | 1e-08 | 63% | <a href="#">WP_031746695.1</a> |
| hypothetical protein [Mycobacterium<br>tuberculosis]                               | 56.6 | 164 | 23% | 1e-08 | 63% | <a href="#">WP_031683605.1</a> |
| hypothetical protein [Mycobacterium<br>tuberculosis]                               | 56.6 | 113 | 23% | 1e-08 | 63% | <a href="#">WP_031733083.1</a> |
| hypothetical protein [Mycobacterium<br>tuberculosis]                               | 56.6 | 112 | 23% | 1e-08 | 63% | <a href="#">WP_031739612.1</a> |
| hypothetical protein [Mycobacterium<br>tuberculosis]                               | 56.6 | 168 | 23% | 1e-08 | 63% | <a href="#">WP_031751962.1</a> |
| hypothetical protein [Mycobacterium<br>tuberculosis]                               | 56.6 | 168 | 23% | 1e-08 | 63% | <a href="#">WP_031660508.1</a> |
| hypothetical protein [Mycobacterium<br>tuberculosis]                               | 56.6 | 168 | 23% | 1e-08 | 63% | <a href="#">WP_031734369.1</a> |
| hypothetical protein [Mycobacterium<br>tuberculosis]                               | 56.6 | 168 | 23% | 1e-08 | 63% | <a href="#">WP_031657702.1</a> |
| hypothetical protein [Mycobacterium<br>tuberculosis]                               | 56.6 | 107 | 23% | 1e-08 | 63% | <a href="#">WP_019830540.1</a> |

|                                                                         |      |      |     |       |     |                                |
|-------------------------------------------------------------------------|------|------|-----|-------|-----|--------------------------------|
| MULTISPECIES: hypothetical protein [Mycobacterium tuberculosis complex] | 56.6 | 168  | 23% | 1e-08 | 63% | <a href="#">WP_003910319.1</a> |
| hypothetical protein [Mycobacterium tuberculosis]                       | 56.6 | 168  | 23% | 1e-08 | 63% | <a href="#">WP_031718476.1</a> |
| hypothetical protein [Mycobacterium tuberculosis]                       | 56.6 | 168  | 22% | 1e-08 | 60% | <a href="#">WP_031697158.1</a> |
| hypothetical protein [Mycobacterium tuberculosis]                       | 56.6 | 112  | 23% | 1e-08 | 63% | <a href="#">WP_031725511.1</a> |
| hypothetical protein [Mycobacterium tuberculosis]                       | 56.6 | 163  | 23% | 1e-08 | 63% | <a href="#">WP_029401577.1</a> |
| hypothetical protein [Mycobacterium tuberculosis]                       | 56.6 | 168  | 23% | 1e-08 | 63% | <a href="#">WP_031653759.1</a> |
| mycolyltransferase II [Mycobacterium tuberculosis 3280CJ]               | 56.6 | 160  | 22% | 1e-08 | 63% | <a href="#">KBT47326.1</a>     |
| mycolyltransferase II [Mycobacterium tuberculosis KT-0024]              | 56.6 | 111  | 22% | 1e-08 | 63% | <a href="#">KCF81928.1</a>     |
| hypothetical protein [Mycobacterium tuberculosis]                       | 56.2 | 112  | 23% | 1e-08 | 63% | <a href="#">WP_031695280.1</a> |
| hypothetical protein [Mycobacterium tuberculosis]                       | 56.6 | 159  | 22% | 1e-08 | 63% | <a href="#">WP_029399667.1</a> |
| mycolyltransferase II [Mycobacterium tuberculosis BTB08-022]            | 56.2 | 56.2 | 22% | 1e-08 | 63% | <a href="#">KCO53466.1</a>     |
| hypothetical protein [Mycobacterium tuberculosis]                       | 56.6 | 166  | 23% | 1e-08 | 56% | <a href="#">WP_031696050.1</a> |
| mycolyltransferase II [Mycobacterium tuberculosis 2100HD]               | 56.6 | 167  | 23% | 1e-08 | 63% | <a href="#">KAN23112.1</a>     |
| hypothetical protein [Mycobacterium tuberculosis]                       | 56.2 | 110  | 23% | 1e-08 | 56% | <a href="#">WP_031727331.1</a> |
| hypothetical protein [Mycobacterium tuberculosis]                       | 55.8 | 110  | 22% | 1e-08 | 63% | <a href="#">WP_031737597.1</a> |
| hypothetical protein [Mycobacterium tuberculosis]                       | 56.6 | 166  | 22% | 1e-08 | 63% | <a href="#">WP_031686648.1</a> |
| hypothetical protein [Mycobacterium tuberculosis]                       | 56.2 | 85.9 | 22% | 1e-08 | 63% | <a href="#">WP_031678613.1</a> |
| hypothetical protein [Mycobacterium tuberculosis]                       | 56.2 | 88.6 | 22% | 1e-08 | 63% | <a href="#">WP_031679079.1</a> |
| hypothetical protein [Mycobacterium tuberculosis]                       | 56.2 | 111  | 22% | 1e-08 | 63% | <a href="#">WP_031699807.1</a> |
| hypothetical protein IQ43_03965 [Mycobacterium tuberculosis]            | 56.2 | 56.2 | 22% | 1e-08 | 63% | <a href="#">AIH20377.1</a>     |
| hypothetical protein [Mycobacterium tuberculosis]                       | 56.2 | 99.0 | 22% | 1e-08 | 63% | <a href="#">WP_025686908.1</a> |
| hypothetical protein [Mycobacterium tuberculosis]                       | 56.2 | 56.2 | 22% | 1e-08 | 63% | <a href="#">WP_031695282.1</a> |
| hypothetical protein [Mycobacterium tuberculosis]                       | 56.2 | 95.5 | 22% | 1e-08 | 63% | <a href="#">WP_003916319.1</a> |
| mycolyltransferase II [Mycobacterium tuberculosis M991]                 | 56.2 | 56.2 | 22% | 1e-08 | 63% | <a href="#">KAX16386.1</a>     |
| hypothetical protein [Mycobacterium tuberculosis]                       | 56.2 | 56.2 | 22% | 1e-08 | 63% | <a href="#">WP_031662455.1</a> |
| peptidoglycan-binding protein [Mycobacterium tuberculosis]              | 51.2 | 51.2 | 18% | 3e-08 | 59% | <a href="#">WP_031744498.1</a> |
| mycolyltransferase II [Mycobacterium tuberculosis TB_RSA118]            | 54.3 | 54.3 | 22% | 6e-08 | 61% | <a href="#">KCJ48237.1</a>     |
| hypothetical protein IU16_04040 [Mycobacterium tuberculosis]            | 51.6 | 51.6 | 21% | 4e-07 | 61% | <a href="#">AIH63307.1</a>     |
| hypothetical protein IQ47_04010 [Mycobacterium tuberculosis]            | 50.1 | 50.1 | 20% | 2e-06 | 60% | <a href="#">AIH34911.1</a>     |

hypothetical protein [Mycobacterium tuberculosis]

48.5

48.5

20%

6e-06

60%

[WP\\_031682793.1](#)

## Alignments

hypothetical protein K875\_04270 [Mycobacterium tuberculosis TKK-01-0051]

Sequence ID: **gb|KBZ61319.1|** Length: 202 Number of Matches: 1

Range 1: 1 to 202

| Score         | Expect  | Method                                                       | Identities   | Positives    | Gaps      | Frame |
|---------------|---------|--------------------------------------------------------------|--------------|--------------|-----------|-------|
| 255 bits(651) | 1e-84() | Compositional matrix adjust.                                 | 150/208(72%) | 163/208(78%) | 6/208(2%) |       |
| Features:     |         |                                                              |              |              |           |       |
| Query 1       |         | MGDTLTAGOKLERGGSLQSGNGAYTLTLQDDGNLVLYARDKAVWSTGTNGQDVVRAEVQT |              |              |           | 60    |
| Sbjct 1       |         | M DTLT GOKL RG SL S NGAYTLTL+DDGNLVL +R +A+WST T GQ+VVRAEVQ  |              |              |           | 60    |
| Query 61      |         | DGNFVLYTAEKPVWHTDTKGKKEVKLVLODDRNLVLYAKDGPWSSKTDTEPPPPAPEP   |              |              |           | 120   |
| Sbjct 61      |         | DGNFVLYTA+KPVWHTDTKGKK+VKLVLODDRNLVLYA DGPWSS+ T+T PPPPAPE   |              |              |           | 120   |
| Query 121     |         | EKEAEVAPAAAAEAPAPVAEPAPAPAPAPAPAPAPRTYTVVSGDTLWAIARFYGD      |              |              |           | 180   |
| Sbjct 121     |         | -----AADEPAAQAEAAVADEAPAEVAAEPAPEPEPAARTYTVASGDTLWAIARFYGD   |              |              |           | 174   |
| Query 181     |         | GSKYQOIADASGIANPDLIHGQVLTIP                                  | 208          |              |           |       |
| Sbjct 175     |         | G++YQ IADASGI+NPDLI PGQVLTIP                                 |              |              |           |       |
|               |         | GNRYQAIADASGISNPDLIQPGQVLTIP                                 | 202          |              |           |       |

peptidoglycan-binding protein, partial [Mycobacterium tuberculosis]

Sequence ID: **ref|WP\_029404272.1|** Length: 53 Number of Matches: 1

Range 1: 7 to 53

| Score          | Expect  | Method                                          | Identities | Positives  | Gaps     | Frame |
|----------------|---------|-------------------------------------------------|------------|------------|----------|-------|
| 62.4 bits(150) | 3e-12() | Compositional matrix adjust.                    | 29/47(62%) | 37/47(78%) | 0/47(0%) |       |
| Features:      |         |                                                 |            |            |          |       |
| Query 162      |         | YTVVSGDTLWAIARFYGDGSKYQOIADASGIANPDLIHGQVLTIP   | 208        |            |          |       |
| Sbjct 7        |         | YTVV+GDTL A+A RFYGD Y+ IA ASGIA+PD+++ GQ L +P   |            |            |          |       |
|                |         | YTVVAGDTLSALALRFYGDAELYRLIAAASGIADPDVVNVGQRLIMP | 53         |            |          |       |

hypothetical protein, partial [Mycobacterium tuberculosis]

Sequence ID: **ref|WP\_029401579.1|** Length: 101 Number of Matches: 2

Range 1: 56 to 101

| Score          | Expect  | Method                                          | Identities | Positives  | Gaps     | Frame |
|----------------|---------|-------------------------------------------------|------------|------------|----------|-------|
| 60.5 bits(145) | 3e-11() | Compositional matrix adjust.                    | 28/46(61%) | 36/46(78%) | 0/46(0%) |       |
| Features:      |         |                                                 |            |            |          |       |
| Query 162      |         | YTVVSGDTLWAIARFYGDGSKYQOIADASGIANPDLIHGQVLTIP   | 207        |            |          |       |
| Sbjct 56       |         | YTVV+GDTL A+A RFYGD Y+ IA ASGIA+PD+++ GQ L +P   |            |            |          |       |
|                |         | YTVVAGDTLSALALRFYGDAELYRLIAAASGIADPDVVNVGQRLIMP | 101        |            |          |       |

Range 2: 4 to 51

| Score          | Expect  | Method                                           | Identities | Positives  | Gaps     | Frame |
|----------------|---------|--------------------------------------------------|------------|------------|----------|-------|
| 58.9 bits(141) | 1e-10() | Compositional matrix adjust.                     | 27/48(56%) | 37/48(77%) | 0/48(0%) |       |
| Features:      |         |                                                  |            |            |          |       |
| Query 161      |         | YTVVSGDTLWAIARFYGDGSKYQOIADASGIANPDLIHGQVLTIP    | 208        |            |          |       |
| Sbjct 4        |         | T+ VV+G+TL A+A RFYGD Y+ IA ASGIA+PD+++ GQ L +P   |            |            |          |       |
|                |         | THAVVAGETLSALALRFYGDAELYRLIAAASGIADPDVVNVGQRLIMP | 51         |            |          |       |

hypothetical protein, partial [Mycobacterium tuberculosis]

Sequence ID: **ref|WP\_031742300.1|** Length: 76 Number of Matches: 2  
Range 1: 4 to 51

| Score          | Expect  | Method                       | Identities | Positives  | Gaps     | Frame |
|----------------|---------|------------------------------|------------|------------|----------|-------|
| 58.9 bits(141) | 7e-11() | Compositional matrix adjust. | 27/48(56%) | 37/48(77%) | 0/48(0%) |       |

Features:

```
Query 161  YTVVSGDTLWAI AERFYGDGSKYQQIADASGIANPDLIHPGOVLTIP 208
           T+ VV+G+TL A+A RFYGD  Y+ IA ASGIA+PD+++ GQ L +P
Sbjct 4     THAVVAGETLSALALRFYGDAELYRLIAAASGIADPDVVNVGQRLIMP 51
```

Range 2: 56 to 74

| Score         | Expect  | Method                       | Identities | Positives  | Gaps     | Frame |
|---------------|---------|------------------------------|------------|------------|----------|-------|
| 33.5 bits(75) | 0.098() | Compositional matrix adjust. | 14/19(74%) | 17/19(89%) | 0/19(0%) |       |

Features:

```
Query 162  YTVVSGDTLWAI AERFYGD 180
           YTVV+G+TL A+A RFYGD
Sbjct 56    YTVVAGETLSALALRFYGD 74
```

hypothetical protein, partial [Mycobacterium tuberculosis]

Sequence ID: **ref|WP\_031678612.1|** Length: 65 Number of Matches: 1  
Range 1: 4 to 51

| Score          | Expect  | Method                       | Identities | Positives  | Gaps     | Frame |
|----------------|---------|------------------------------|------------|------------|----------|-------|
| 58.5 bits(140) | 7e-11() | Compositional matrix adjust. | 27/48(56%) | 37/48(77%) | 0/48(0%) |       |

Features:

```
Query 161  YTVVSGDTLWAI AERFYGDGSKYQQIADASGIANPDLIHPGOVLTIP 208
           T+ VV+G+TL A+A RFYGD  Y+ IA ASGIA+PD+++ GQ L +P
Sbjct 4     THAVVAGETLSALALRFYGDAELYRLIAAASGIADPDVVNVGQRLIMP 51
```
